# Supplementary material for: Clinical, Hematologic, Biologic and Molecular Characteristics of Patients with Myeloproliferative Neoplasms and a Chronic Myelomonocytic Leukemia-Like Phenotype
Source: PubMed Central journal article supplement (PMC7409251; doi:10.3390/cancers12071891), 2020-07-14

## **Supplementary Materials: Clinical, Hematologic, Biologic and Molecular Characteristics of Patients with Myeloproliferative Neoplasms and a Chronic Myelomonocytic Leukemia-Like Phenotype**

Sonja Heibl, Bettina Gisslinger, Eva Jäger, Agnes Barna, Michael Gurbisz, Maike Stegemann, Peter Bettelheim, Sigrid Machherndl-Spandl, Michael Pfeilstöcker, Thomas Nösslinger, Gökhan Uyanik, Gregor Hoermann, Reinhard Stauder, Josef Thaler, Rajko Kusec, Peter Valent, Heinz Gisslinger, Klaus Geissler

**Table 1.** Features of 41 patients with myeloproliferative neoplasms developing a chronic myelomonocytic leukemia-like phenotype.

| Nr   | Primary Diagn. | Age/sex | JAK2 Status   | Cytoreductive Therapy | Date of Prim. Diagn. | Date of Conversion | Interval (Months) | Trans f. | WBC G/L | Hb g/dl | HC % | PLT G/L | Mo % | AMC G/L |
|------|----------------|---------|---------------|-----------------------|----------------------|--------------------|-------------------|----------|---------|---------|------|---------|------|---------|
| 1/1  | PV             | 63/m    | NA            | HU                    | 4/07                 | 3/09               | 23                | no       | 15.5    | 15.4    | 45.4 | 668     | 10   | 1.6     |
| 1/2  | PV             | 74/f    | JAK2<br>V617F | -                     | 8/18                 | 3/20               | 19                | no       | 9.4     | 13.3    | 46.9 | 388     | 13   | 1.2     |
| 1/3  | PV             | 68/f    | JAK2<br>V617F | -                     | 12/16                | 12/16              | 0                 | no       | 21.5    | 14.3    | 44.6 | 1148    | 15   | 3.2     |
| 1/4  | PV             | 80/m    | JAK2<br>V617F | -                     | 7/14                 | 1/16               | 18                | no       | 63.5    | 14.1    | 50.0 | 273     | 18   | 11.4    |
| 1/5  | PV             | 51/m    | JAK2<br>V617F | HU, ANA               | 5/14                 | 3/16               | 22                | no       | 16.8    | 10.8    | 38.5 | 575     | 14   | 2.4     |
| 1/6  | PV             | 78/m    | NA            | -                     | 2/13                 | 12/18              | 70                | no       | 18.9    | 8.8     | 24.6 | 275     | 10   | 1.9     |
| 1/7  | PV             | 84/f    | NA            | HU                    | 10/10                | 4/16               | 66                | no       | 38.8    | 8.2     | 24.5 | 549     | 60   | 23.3    |
| 1/8  | PV             | 72/f    | JAK2<br>V617F | -                     | 11/14                | 9/19               | 58                | no       | 12.2    | 13.4    | 45.3 | 358     | 15   | 1.8     |
| 1/9  | PV             | 73/m    | JAK2<br>V617F | IFN                   | 5/86                 | 2/20               | 405               | no       | 4.6     | 8.8     | 25.0 | 176     | 50   | 2.3     |
| 1/10 | PV             | 67/m    | JAK2<br>V617F | HU, AZA, RUX          | 8/14                 | 12/19              | 64                | no       | 29.6    | 10.3    | 31.1 | 225     | 12   | 3.6     |
| 1/11 | PV             | 70/f    | NA            | -                     | 4/04                 | 4/04               | 0                 | no       | 33.5    | 12.3    | 44.5 | 13      | 20   | 6.7     |
| 1/12 | PV             | 82/m    | JAK2<br>V617F | Vyxeos                | 5/02                 | 10/19              | 209               | AML      | 4.4     | 8.6     | 25.4 | 72      | 54   | 2.4     |
| 1/13 | PV             | 78/m    | NA            | HU, MEP, AZA          | 6/97                 | 2/08               | 128               | AML      | 13.4    | 16.7    | 50.8 | 116     | 10   | 1.3     |
| 1/14 | ET             | 72/m    | JAK2<br>V617F | IFN                   | 12/99                | 3/11               | 135               | no       | 28.7    | 13.5    | 41.6 | 352     | 14   | 4       |
| 1/15 | PMF            | 77/m    | neg           | -                     | 5/05                 | 5/08               | 36                | no       | 4.3     | 11.3    | 34.4 | 69      | 27   | 1.2     |
| 1/16 | PMF            | 72/m    | JAK2<br>V617F | HU, AZA, RUX          | 2/14                 | 10/15              | 20                | AML      | 176.8   | 6.6     | 22.3 | 86      | 10   | 17.7    |

|          |    |      |               |                           |       |       |     |     |      |      |      |      |    |     |
|----------|----|------|---------------|---------------------------|-------|-------|-----|-----|------|------|------|------|----|-----|
| 2/1      | PV | 70/f | JAK2<br>V617F | HU                        | 11/18 | 11/18 | 0   | no  | 9.2  | 18.9 | 56.6 | 529  | 14 | 1,3 |
| 2/2      | PV | 61/m | JAK2<br>V617F | IFN, HU                   | 6/18  | 6/18  | 0   | no  | 23.3 | 17.4 | 51.9 | 286  | 13 | 3.0 |
| 2/3      | PV | 84/m | JAK2<br>V617F | HU, RUX                   | 6/13  | 2/16  | 32  | no  | 6.8  | 8.9  | 27.2 | 304  | 17 | 1.1 |
| 2/4      | PV | 86/f | JAK2<br>V617F | HU                        | 4/17  | 4/17  | 0   | no  | 7.1  | 16.2 | 54.7 | 333  | 17 | 1.2 |
| 2/5      | PV | 93/f | JAK2<br>V617F | HU                        | 5/16  | 4/17  | 11  | no  | 12.8 | 14.0 | 49.9 | 1241 | 12 | 1.5 |
| 2/6      | PV | 81/m | JAK2<br>V617F | HU                        | 4/15  | 6/15  | 2   | no  | 26.2 | 15.6 | 52.0 | 159  | 11 | 2.9 |
| 2/7      | PV | 70/m | JAK2<br>V617F | HU, AZA, LD-ARAC          | 4/11  | 6/13  | 26  | AML | 5.4  | 8.7  | 25.7 | 49   | 14 | 1.1 |
| 2/8      | PV | 70/m | NA            | HU, AZA                   | 1/10  | 5/16  | 76  | AML | 6.9  | 18.4 | 54.2 | 339  | 16 | 1.1 |
| 2/9      | PV | 84/f | JAK2<br>V617F | HU                        | 5/09  | 2/15  | 69  | no  | 10.1 | 14.8 | 44.1 | 465  | 12 | 1.3 |
| 2/1<br>0 | PV | 76/m | JAK2<br>V617F | HU                        | 4/08  | 4/08  | 0   | no  | 13.0 | 16.4 | 48.7 | 370  | 12 | 1.6 |
| 2/1<br>1 | PV | 79/f | neg           | LEN, HU, RUX              | 3/07  | 7/09  | 28  | no  | 16.9 | 9.7  | 31.0 | 205  | 18 | 3.0 |
| 2/1<br>2 | PV | 67/f | JAK2<br>V617F | HU, AZA                   | 7/05  | 11/13 | 100 | AML | 5.2  | 6.0  | 17.0 | 83   | 30 | 1.6 |
| 2/1<br>3 | PV | 70/f | JAK2<br>V617F | IFN, HU, ANA, BUS,<br>RUX | 12/93 | 5/18  | 293 | no  | 6.4  | 13.0 | 47.8 | 555  | 21 | 1.3 |
| 2/1<br>4 | PV | 69/f | JAK2<br>V617F | HU, RUX                   | 7/82  | 3/18  | 428 | no  | 30.2 | 14.1 | 46.7 | 92   | 15 | 3.9 |
| 3/1      | PV | 65/m | JAK2<br>V617F | HU                        | 6/12  | 12/19 | 90  | no  | 16.9 | 13.8 | 44.3 | 584  | 10 | 1.7 |
| 4/1      | PV | 56/m | JAK2<br>V617F | -                         | 2/11  | 2/11  | 0   | no  | 13.9 | 16.4 | 51.9 | 23   | 11 | 1.5 |
| 4/2      | PV | 70/f | JAK2<br>V617F | IFN                       | 10/92 | 10/92 | 0   | no  | 12.7 | 15.1 | 47.5 | 613  | 18 | 2.3 |
| 4/3      | PV | 57/m | JAK2<br>V617F | HU                        | 10/10 | 10/10 | 0   | no  | 19.2 | 16.3 | 47.4 | 667  | 11 | 2.1 |

|          |     |      |                             |        |       |       |     |     |      |      |      |     |    |      |
|----------|-----|------|-----------------------------|--------|-------|-------|-----|-----|------|------|------|-----|----|------|
| 4/5      | PV  | 69/m | neg                         | -      | 5/10  | 1/15  | 56  | no  | 9.2  | 11.2 | 34.3 | 321 | 12 | 1.1  |
| 4/6      | PV  | 48/m | NA                          | -      | 4/97  | 11/00 | 43  | no  | 14.0 | 14.7 | 43.9 | 699 | 11 | 1.5  |
| 4/7      | PV  | 50/f | NA                          | TX     | 10/02 | 7/14  | 141 | AML | 12.7 | 14.4 | 38.0 | 327 | 11 | 1.4  |
| 4/8      | PV  | 85/f | <i>JAK2</i><br><i>V617F</i> | HU     | 8/02  | 11/07 | 63  | no  | 42.8 | 7.4  | 22.9 | 18  | 38 | 16.3 |
| 4/9      | PMF | 73/m | NA                          | -      | 2/91  | 5/98  | 87  | AML | 34.5 | 8.9  | 28.5 | 336 | 10 | 3.5  |
| 4/1<br>0 | PMF | 72/f | <i>JAK2</i><br><i>V617F</i> | IM, HU | 5/99  | 11/00 | 18  | no  | 12.8 | 13.0 | 38.8 | 490 | 32 | 4.1  |
| 4/1<br>1 | PMF | 67/m | NA                          | -      | 7/98  | 10/98 | 3   | AML | 10.5 | 9.1  | 28.5 | 52  | 25 | 2.6  |

CMML, chronic myelomonocytic leukemia; PV, polycythemia vera; ET, essential thrombocythemia; PMF, primary myelofibrosis; NA, not available; HU, hydroxyurea; ANA, anagrelide; IFN, interferon; AZA, azacitidine; RUX, ruxolitinib; MEP, meprobaman; LD-ARAC, low dose cytarabine; BUS, busulfan; TX, transplantation; IM, imatinib; AML, acute myeloid leukemia; WBC, white blood cell count; Hb, hemoglobin; HC, hematocrite; PLT, platelet value; Mo, monocytes; AMC, absolute monocyte count. The blood pictures in this table are at the time when patients developed a CMML-like phenotype.

Table S2. Variants of additional mutations in patients with MPN/CMML and JAK2-mutated CMML.

| Sample                   | Gene   | cDNA Change        | Amino Acid Change  | Variant Allele Frequency |
|--------------------------|--------|--------------------|--------------------|--------------------------|
| <b>MPN/CMML</b>          |        |                    |                    |                          |
| 1                        | JAK2   | c.1849G > T        | p.Val617Phe        | 79.5%                    |
|                          | TET2   | c.5707C > T        | p.Gln1903*         | 46.9%                    |
|                          | TET2   | c.2626C > T        | p.Gln876*          | 46.0%                    |
| 2                        | JAK2   | c.1849G > T        | p.Val617Phe        | 44.2%                    |
|                          | TET2   | c.5473C > T        | p.Gln1825*         | 43.4%                    |
|                          | TET2   | c.2746C > T        | p.Gln916*          | 42.2%                    |
| 3                        | JAK2   | c.1849G > T        | p.Val617Phe        | 68.5%                    |
|                          | TET2   | c.1648C > T        | p.Arg550*          | 36.4%                    |
|                          | TET2   | c.3508C > T        | p.Gln1170*         | 34.4%                    |
| 4                        | JAK2   | c.1849G > T        | p.Val617Phe        | 7.3%                     |
|                          | TET2   | c.2200dupC         | p.Gln734Profs*20   | 44.5%                    |
|                          | TET2   | c.5500C > T        | p.Gln1834*         | 42.0%                    |
|                          | SRSF2  | c.284C > A         | p.Pro95His         | 44.7%                    |
|                          | KRAS   | c.35G > T          | p.Gly12Val         | 42.8%                    |
| 5                        | JAK2   | c.1849G > T        | p.Val617Phe        | 78.1%                    |
|                          | TET2   | c.1064G > A        | p.Gly376Asp        | 62.2%                    |
|                          | ASXL1  | c.2261C > A        | p.Glu635fs         | 38.0%                    |
|                          | EZH2   | c.553G > C         | p.Asp185His        | 36.0%                    |
|                          | SRSF2  | c.284C > T         | p.Pro95Leu         | 49.0%                    |
|                          | NRAS   | c.35G > A          | p.Gly12Asp         | 28.5%                    |
|                          | SETBP1 | c.691/G > C        | p.Val231Leu        | 74.3%                    |
| 6                        | JAK2   | c.1849G > T        | p.Val617Phe        | 46.0%                    |
|                          | TET2   | c.3094C > G        | p.Leu1032Val       | 50.2%                    |
|                          | ASXL1  | c.3217C > T        | p.Arg1073Cys       | 52.7%                    |
|                          | SRSF2  | c.284C > A         | p.Pro95His         | 46.3%                    |
|                          | CSF3R  | c.1213G > A        | p.Glu405Lys        | 51.6%                    |
|                          | RUNX1  | c.898delA          | p.Thr300Rfs*11     | 46.5%                    |
| 7                        | JAK2   | c.1849G > T        | p.Val617Phe        | 96.7%                    |
|                          | ASXL1  | c.2077C > T        | p.Arg693*          | 49.5%                    |
|                          | KRAS   | c.35G > A          | p.Gly12Asp         | 28.1%                    |
| 8                        | JAK2   | c.1849G > T        | p.Val617Phe        | 39.6%                    |
|                          | IDH2   | c.419G > A         | p.Arg140Gln        | 44.6%                    |
|                          | SRSF2  | c.283C > A         | p.Pro95Thr         | 45.0%                    |
|                          | CEBPA  | c.584_589dupACCCGC | p.His195.Pro196dup | 43.5%                    |
| 9                        | JAK2   | c.1849G > T        | p.Val617Phe        | <5.0%                    |
|                          | IDH1   | c.394C > T         | p.Arg132Cys        | 32.3%                    |
|                          | U2AF1  | c.101C > T         | p.Ser34Phe         | 42.1%                    |
| 10                       | JAK2   | c.1849G > T        | p.Val617Phe        | 7.0%                     |
|                          | U2AF1  | c.101C > A         | p.Ser34Tyr         | 42.3%                    |
| 11                       | JAK2   | c.1849G > T        | p.Val617Phe        | 33.6%                    |
|                          | KRAS   | c.34G > C          | p.Gly12Arg         | 24.5%                    |
| <b>JAK2-mutated CMML</b> |        |                    |                    |                          |
| 12                       | JAK2   | c.1849G > T        | p.Val617Phe        | 91.6%                    |
|                          | TET2   | c.3541G > A        | p.Val1181Ile       | 40.7%                    |
| 13                       | JAK2   | c.1849G > T        | p.Val617Phe        | 8.9%                     |
|                          | TET2   | c.4579C > T        | p.Gln1527*         | 48.0%                    |
|                          | SRSF2  | c.284C > T         | p.Pro95Leu         | 48.7%                    |
| 14                       | KIT    | c.2447A > T        | p.Asp816Val        | 27.5%                    |
|                          | JAK2   | c.1849G > T        | p.Val617Phe        | 43.6%                    |
| 14                       | TET2   | c.4223A > G        | p.Asn1387Ser       | 48.3%                    |
|                          | TET2   | c.1608A > G        | p.Ile1762Val       | 52.3%                    |
| 15                       | JAK2   | c.1849G > T        | p.Val617Phe        | 31.2%                    |

|    |               |             |                   |       |
|----|---------------|-------------|-------------------|-------|
|    | <i>TET2</i>   | c.5284A > G | p.Ile1762Val      | 52.1% |
|    | <i>JAK2</i>   | c.1849G > T | p.Val617Phe       | 42.3% |
|    | <i>TET2</i>   | c.2599T > C | p.Tyr867His       | 48.7% |
| 16 | <i>ASXL1</i>  | c.2678G > A | p.Trp893*         | 41.5% |
|    | <i>IDH2</i>   | c.44G > A   | p.Arg88Gln        | 38.0% |
|    | <i>U2AF1</i>  | c.248G > A  | p.Arg83His        | 36.3% |
|    | <i>SETBP1</i> | c.691G > C  | p.Val231Leu       | 47.3% |
|    | <i>JAK2</i>   | c.1849G > T | p.Val617Phe       | 26.2% |
| 17 | <i>TET2</i>   | c.5018delC  | p.Pro1673Hisfs*22 | 45.2% |
|    | <i>ASXL1</i>  | c.2757dupA  | p.Pro920Thrfs*4   | 43.2% |
|    | <i>SRSF2</i>  | c.284C > A  | p.Pro95His        | 47.3% |
|    | <i>JAK2</i>   | c.1849G > T | p.Val617Phe       | 29.3% |
|    | <i>TET2</i>   | c.191T > G  | p.Cys1289Trp      | 49.5% |
| 18 | <i>EZH2</i>   | c.1720G > A | p.Gly574Arg       | 48.7% |
|    | <i>SETBP1</i> | c.691/G > C | p.Val231Leu       | 49.0% |
|    | <i>KRAS</i>   | c.179G > T  | p.Gly60Val        | 48.4% |
|    | <i>JAK2</i>   | c.1849G > T | p.Val617Phe       | 48.8% |
|    | <i>TET2</i>   | c.5347A > G | p.Ile1783Val      | 98.0% |
| 19 | <i>U2AF1</i>  | c.251A > C  | p.Gln157Pro       | 35.1% |
|    | <i>SETBP1</i> | c.2602G > A | p.Asp868Asn       | 40.7% |
|    | <i>PTPN11</i> | c.1530G > T | p.Gln510His       | 38.8% |
|    | <i>JAK2</i>   | c.1849G > T | p.Val617Phe       | 34.9% |
| 20 | <i>TET2</i>   | c.1608A > G | p.Ile1762Val      | 50.0% |
|    | <i>U2AF1</i>  | c.251A > G  | p.Gln84Arg        | 50.0% |
|    | <i>JAK2</i>   | c.1849G > T | p.Val617Phe       | 89.9% |
| 21 | <i>TET2</i>   | c.1486T > G | p.Leu1721Trp      | 50.0% |
|    | <i>TET2</i>   | c.3632G > A | p.Cys1211Tyr      | 47.5% |
|    | <i>SRSF2</i>  | c.284C > A  | p.Pro95His        | 43.7% |
|    | <i>JAK2</i>   | c.1849G > T | p.Val617Phe       | 49.5% |
| 22 | <i>TET2</i>   | c.3430dupG  | p.Glu1144Glyfs*   | 44.5% |
|    | <i>SRSF2</i>  | c.284C > A  | p.Pro95His        | 47.1% |
|    | <i>JAK2</i>   | c.1849G > T | p.Val617Phe       | 91.2% |
| 23 | <i>EZH2</i>   | c.553G > C  | p.Asp185His       | 66.6% |
|    | <i>DNMT3A</i> | c.2077C > T | p.Arg693Cys       | 36.4% |
|    | <i>NF1</i>    | c.4367G > C | p.Arg1456Thr      | 79.3% |
|    | <i>JAK2</i>   | c.1849G > T | p.Val617Phe       | 6.4%  |
| 24 | <i>DNMT3A</i> | c.2204A > G | p.Tyr735Cys       | 23.1% |
|    | <i>DNMT3A</i> | c.2095G > T | p.Gly699Cys       | 22.6% |
|    | <i>RUNX1</i>  | c.167T > C  | p.Leu56Ser        | 46.8% |
| 25 | <i>JAK2</i>   | c.1849G > T | p.Val617Phe       | 85.3% |
|    | <i>U2AF1</i>  | c.101C > A  | p.Ser34Tyr        | 38.0% |

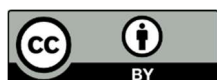

Supplement: cancers-12-01891-s001.pdf [file cancers-12-01891-s001.pdf]
